# Supplementary material
Source: Research Square preprint supplement (doi:10.21203/rs.3.rs-6505999/v1)
Supplement: Supplementary file 2 [file 719afc205554f33b3c883450.docx]

Supplementary Information

Data-In-situ Computing with One-Pixel-Multiple-Memristor Architecture for Neuromorphic Sequential Vision

Sun et al.

Supplementary Figures 1−14.

Supplementary Tables 1−4.

Supplementary Notes 1−4.
